# Supplementary material for: Selective Aerobic Oxidation of P-Methoxytoluene by Co(II)-Promoted NHPI Incorporated into Cross-Linked Copolymer Structure
Source: MDPI journal article supplement (doi:10.3390/catal11121474), 2021-12-01
Supplement: s1 [file s1]

## Supplementary Material

# Selective Aerobic Oxidation of P-Methoxytoluene by Co(II)-Promoted NHPI Incorporated into Cross-Linked Copolymer Structure

Tomasz Berniak, Piotr Łątka, Anna Rokicińska, Karol Sidor and Piotr Kuśtrowski \*

Faculty of Chemistry, Jagiellonian University, Gronostajowa 2, 30-387 Kraków, Poland; tomasz.berniak@doctoral.uj.edu.pl (T.B.); piotr.lotka@uj.edu.pl (P.Ł.); anna.rokicinska@uj.edu.pl (A.R.); karol.sidor@doctoral.uj.edu.pl (K.S.)

\* Correspondence: piotr.kustrowski@uj.edu.pl; Tel.: +48-12-686-2415

**Abstract:** A wide series of copolymer materials with various contents of 4-vinyl-diisopropyl-phthalate ester (10–90 mol%), divinylbenzene (1–11 mol%) and styrene, as monomers, were obtained by radical copolymerization. In the last steps of the synthesis, diisopropyl ester functionalities were converted into the form of N-hydroxyphthalimide (NHPI) rings. The obtained materials with the NHPI groups immobilized in the copolymer structure were studied by various physicochemical techniques, including FT-IR, UV-Vis-DR, XPS, elemental analysis, and tested as catalysts in aerobic oxidation of p-methoxytoluene in the presence of Co(II) acetate co-catalyst. Conversion of the aromatic substrate was correlated with the NHPI content and cross-linking degree. The best catalytic performance (conversions higher than 23%) was achieved for the copolymer catalysts containing 60% and 30% of 4-vinyl-diisopropyl-phthalate ester. At too high concentrations of NHPI and DVB, some of the NHPI groups were transformed into inactive (C=O)-N=O species or not available due to embedding inside the copolymer structure. The mechanism of the process involving both NHPI centers, forming phthalimide N-oxyl (PINO) radicals, and Co(II) cations was discussed. Stability of the developed catalysts was also tested. The opening of imide rings took place during the catalytic process, resulting in the formation of carboxyl groups and the release of hydroxylamine molecules. The deactivated catalyst could be easily regenerated by repeating two last steps of closing imide ring.

**Keywords:** copolymerization; 4-vinyl-diisopropyl-phthalate ester monomer; NHPI species; Co(II) co-catalyst; aerobic oxidation of p-methylanisole; reaction mechanisms; copolymer catalyst regeneration

**Citation:** Berniak, T.; Łątka, P.; Rokicińska, A.; Sidor, K.; Kuśtrowski, P. Selective Aerobic Oxidation of P-Methoxytoluene by Co(II)-Promoted NHPI Incorporated into Cross-Linked Copolymer Structure. *Catalysts* **2021**, *11*, 1474. <https://doi.org/10.3390/catal11121474>

Academic Editor: Mauro Bassetti

Received: 31 October 2021

Accepted: 29 November 2021

Published: 1 December 2021

**Publisher's Note:** MDPI stays neutral with regard to jurisdictional claims in published maps and institutional affiliations.

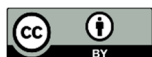

**Copyright:** © 2021 by the authors. Licensee MDPI, Basel, Switzerland. This article is an open access article distributed under the terms and conditions of the Creative Commons Attribution (CC BY) license (<http://creativecommons.org/licenses/by/4.0/>).

**Table S1.** Yield (%) and selectivity to p-anisyl alcohol (%; values given in brackets) in the presence of the copolymer catalysts with different NHPI loadings and cross-linking degrees measured after 6 h tests at 80 °C (0.1 g copolymer catalyst, 5.0 mg AIBN, 5.0 mg Co(OAc)<sub>2</sub>·4H<sub>2</sub>O, 2.0 mL PMT, p<sub>O<sub>2</sub></sub> = 1 atm).

| mol% of DVB | mol% of NHPI  |               |               |               |               |               |               |               |               |
|-------------|---------------|---------------|---------------|---------------|---------------|---------------|---------------|---------------|---------------|
|             | 10            | 20            | 30            | 40            | 50            | 60            | 70            | 80            | 90            |
| 1           | 2.8<br>(19.5) | 0.9<br>(12.2) | 2.6<br>(26.9) | 4.2<br>(25.7) | 0.9<br>(20.3) | 1.6<br>(14.8) | 0.8<br>(26.2) | 0.2<br>(30.5) | 0.8<br>(25.6) |
| 3           | 2.9<br>(28.9) | 1.6<br>(8.8)  | 2.9<br>(17.6) | 3.0<br>(15.8) | 4.0<br>(26.4) | 3.9<br>(22.3) | 0.5<br>(20.3) | 2.1<br>(32.5) | 0.7<br>(30.0) |
| 5           | 1.7<br>(17.2) | 2.9<br>(16.3) | 5.3<br>(28.6) | 2.4<br>(15.7) | 4.5<br>(24.7) | 3.7<br>(15.9) | 0.6<br>(26.6) | 0.3<br>(20.9) | 0.3<br>(27.8) |
| 7           | 2.3<br>(15.6) | 5.3<br>(27.4) | 3.9<br>(16.7) | 4.3<br>(20.0) | 4.1<br>(19.2) | 1.8<br>(18.1) | 0.9<br>(19.9) | 0.9<br>(23.3) | 0.4<br>(20.9) |
| 9           | 3.4<br>(23.9) | 3.8<br>(21.2) | 4.2<br>(19.1) | 1.6<br>(22.4) | 1.2<br>(21.2) | 1.6<br>(31.8) | 2.0<br>(26.9) | 0.7<br>(24.2) | 0.5<br>(21.0) |
| 11          | 2.1<br>(20.6) | 0.4<br>(7.7)  | 2.1<br>(12.6) | 1.3<br>(9.8)  | 0.6<br>(9.2)  | n.m.          | n.m.          | n.m.          | n.m.          |

The most active samples are highlighted by shading background.

**Table S2.** Yield (%) and selectivity to p-anisaldehyde (%; values given in brackets) in the presence of the copolymer catalysts with different NHPI loadings and cross-linking degrees measured after 6 h tests at 80 °C (0.1 g copolymer catalyst, 5.0 mg AIBN, 5.0 mg Co(OAc)<sub>2</sub>·4H<sub>2</sub>O, 2.0 mL PMT, p<sub>O<sub>2</sub></sub> = 1 atm).

| mol% of DVB | mol% of NHPI  |               |               |               |               |               |               |               |               |
|-------------|---------------|---------------|---------------|---------------|---------------|---------------|---------------|---------------|---------------|
|             | 10            | 20            | 30            | 40            | 50            | 60            | 70            | 80            | 90            |
| 1           | 6.0<br>(41.8) | 2.8<br>(36.7) | 3.3<br>(34.1) | 5.9<br>(35.8) | 2.1<br>(48.1) | 5.4<br>(50.0) | 1.1<br>(34.7) | 0.3<br>(45.7) | 0.9<br>(27.4) |
| 3           | 2.9<br>(29.6) | 5.8<br>(33.2) | 5.0<br>(30.5) | 6.2<br>(32.2) | 4.6<br>(30.4) | 4.8<br>(27.1) | 0.9<br>(34.0) | 3.3<br>(50.1) | 1.2<br>(51.7) |
| 5           | 2.7<br>(27.8) | 6.1<br>(34.1) | 4.5<br>(24.2) | 3.5<br>(22.3) | 5.9<br>(32.4) | 4.6<br>(19.6) | 0.8<br>(36.7) | 0.8<br>(55.9) | 0.6<br>(59.4) |
| 7           | 5.2<br>(35.0) | 4.8<br>(24.7) | 5.7<br>(24.1) | 6.9<br>(31.9) | 7.1<br>(32.9) | 3.6<br>(36.1) | 1.5<br>(32.6) | 1.9<br>(49.5) | 0.7<br>(34.5) |
| 9           | 4.9<br>(34.5) | 7.4<br>(41.4) | 7.2<br>(32.8) | 3.5<br>(47.9) | 2.5<br>(43.4) | 2.9<br>(55.0) | 3.4<br>(44.9) | 1.5<br>(53.4) | 1.0<br>(44.3) |
| 11          | 3.7<br>(36.3) | 1.5<br>(29.9) | 5.6<br>(33.7) | 4.4<br>(32.8) | 1.5<br>(23.0) | n.m.          | n.m.          | n.m.          | n.m.          |

The most active samples are highlighted by shading background.

**Table S3.** Yield (%) and selectivity to p-anisic acid (%; values given in brackets) in the presence of the copolymer catalysts with different NHPI loadings and cross-linking degrees measured after 6 h tests at 80 °C (0.1 g copolymer catalyst, 5.0 mg AIBN, 5.0 mg Co(OAc)<sub>2</sub>·4H<sub>2</sub>O, 2.0 mL PMT, p<sub>O<sub>2</sub></sub> = 1 atm).

| mol% of DVB | mol% of NHPI  |               |               |               |               |                |               |               |               |
|-------------|---------------|---------------|---------------|---------------|---------------|----------------|---------------|---------------|---------------|
|             | 10            | 20            | 30            | 40            | 50            | 60             | 70            | 80            | 90            |
| 1           | 4.2<br>(29.3) | 3.2<br>(41.7) | 2.9<br>(30.0) | 5.3<br>(32.2) | 1.1<br>(24.9) | 2.9<br>(26.8)  | 0.9<br>(29.5) | 0.1<br>(18.8) | 1.2<br>(39.3) |
| 3           | 3.5<br>(35.5) | 9.2<br>(52.4) | 8.1<br>(49.7) | 9.4<br>(48.8) | 5.5<br>(36.5) | 8.3<br>(47.5)  | 1.1<br>(39.7) | 1.0<br>(14.8) | 0.2<br>(8.8)  |
| 5           | 4.9<br>(49.5) | 7.3<br>(40.6) | 7.6<br>(41.1) | 8.5<br>(54.6) | 6.6<br>(36.0) | 14.2<br>(61.1) | 0.7<br>(34.4) | 0.3<br>(20.7) | 0.1<br>(9.9)  |
| 7           | 6.0           | 8.3           | 12.8          | 9.1           | 8.4           | 3.7            | 1.9           | 0.7           | 0.8           |

|    | (40.1) | (42.4) | (54.3) | (42.0) | (39.2) | (37.5) | (42.3) | (18.2) | (40.4) |
|----|--------|--------|--------|--------|--------|--------|--------|--------|--------|
| 9  | 5.1    | 5.5    | 8.5    | 1.6    | 1.7    | 0.6    | 1.6    | 0.5    | 0.6    |
|    | (36.5) | (30.9) | (38.7) | (21.5) | (29.2) | (11.6) | (21.0) | (16.5) | (26.1) |
| 11 | 4.2    | 3.1    | 7.5    | 6.5    | 3.9    | n.m.   | n.m.   | n.m.   | n.m.   |
|    | (41.2) | (62.3) | (45.1) | (48.7) | (59.7) |        |        |        |        |

The most active samples are highlighted by shading background.
