# Supplementary material for: Selective Aerobic Oxidation of P-Methoxytoluene by Co(II)-Promoted NHPI Incorporated into Cross-Linked Copolymer Structure
Source: MDPI journal article supplement (doi:10.3390/catal11121474), 2021-12-01
Supplement: s1 [file s1]

Archive with 1 entries (1 files):
- catalysts-1466030-supplementary.pdf
